# Supplementary material
Source: PubMed Central journal article supplement (PMC5406990)
Supplement: Table1.pdf [file Table1.pdf]

| Author                     | Classification | Subjects | Nutrient                                  | Exercise/Condition | Results                               | Comment                                   | Endpoint         |
|----------------------------|----------------|----------|-------------------------------------------|--------------------|---------------------------------------|-------------------------------------------|------------------|
| <b>Macronutrients</b>      |                |          |                                           |                    |                                       |                                           |                  |
| <b>Bennet 1989</b>         | Macronutrient  | 7 M      | Mixed AA                                  | –                  | ↑ MPS                                 | AA alone maximally stimulate MPS          | Metabolism       |
| <b>Smith 1998</b>          | Macronutrient  | 23 M     | EAA<br>NEAA                               | –                  | ↑ MPS<br>↔                            | EAA driver of increased MPS               | Metabolism       |
| <b>Casperson 2012</b>      | Macronutrient  | 8 M      | 12g/d LEU<br>13d                          | –                  | ↑ MPS<br>↑ mTOR signalling            | LEU increases MPS                         | Metabolism       |
| <b>Wall 2013</b>           | Macronutrient  | 24 M     | n=12: 20g PRO<br>n=12: 20g PRO + 2.5g LEU | –                  | > ↑ MPS following PRO+LEU vs. PRO     | LEU co-ingestion with PRO potentiates MPS | Metabolism       |
| <b>Leucine Metabolites</b> |                |          |                                           |                    |                                       |                                           |                  |
| <b>Nissen 1996</b>         | Nutraceutical  | 28 M     | n=15: 3g/d HMB<br>n=13: PLA<br>7wks       | RET 6*wk<br>7wks   | HMB ↑ LBM > placebo<br>HMB ↑ strength | HMB plus RET potentiates gains in LBM     | Mass Performance |

|                       |               |              |                                                                                                      |                          |                                                               |                                            |                     |
|-----------------------|---------------|--------------|------------------------------------------------------------------------------------------------------|--------------------------|---------------------------------------------------------------|--------------------------------------------|---------------------|
| <b>Wilkinson 2013</b> | Nutraceutical | 15 M         | n=8: 3.42g HMB (2.42g pure HMB)<br>n=7: 3.42 g LEU                                                   | –                        | HMB & LEU ↑ MPS,<br>HMB ↑ mTOR signalling > LEU,<br>HMB ↓ MPB | HMB promotes ↑ MPS and ↓ MPB               | Metabolism          |
| <b>Deutz 2013</b>     | Nutraceutical | 4 M<br>15 F  | n=11: 3g/d HMB<br>n=8: PLA                                                                           | 10d bed rest             | HMB ↔ LBM<br>PLA ↓ LBM                                        | HMB preserves muscle mass during disuse    | Mass                |
| <b>Baier 2009</b>     | Nutraceutical | 38 M<br>39 F | n=40: 2 or 3g HMB, 1.5 or 2.25g lysine, 5 or 7.5 g arginine & 0.1g ascorbic acid<br>n=37: PLA<br>1yr | -                        | ↑ FFM                                                         | AA cocktail enhanced muscle mass           | Mass                |
| <b>Panton 2000</b>    | Nutraceutical | 39 M<br>36 F | n=36: HMB (3g/d)<br>n=39: PLA                                                                        | RET 3*wk<br>4 wks        | ↑ strength > PLA                                              | HMB improved muscle function               | Performance         |
| <b>Wilson 2014</b>    | Nutraceutical | 20 M         | n=11: HMB (3g/d)<br>n=9: PLA                                                                         | Periodised RET<br>12 wks | ↑ strength, power and LBM vs. PLA                             | HMB enhances muscle function & hypertrophy | Mass<br>Performance |

|                       |               |              |                                                                  |                      |                                                                   |                                                      |             |
|-----------------------|---------------|--------------|------------------------------------------------------------------|----------------------|-------------------------------------------------------------------|------------------------------------------------------|-------------|
| <b>Vukovich 2001</b>  | Nutraceutical | 8 M          | n=8: 3g/d<br>HMB<br>n=8: 3g/d<br>LEU<br>n=8: 3g/d<br>PLA<br>2wks | -                    | HMB ↑ time to reach<br>VO <sub>2peak</sub><br>HMB & LEU ↑<br>OBLA | HMB<br>improves<br>aerobic<br>performance            | Performance |
| <b>Miramonti 2016</b> | Nutraceutical | 22 M<br>15 F | n=14: 3g/d<br>HMB<br>n=14: 3g/d<br>PLA<br>n=9: CON<br>4 wks      | HIIT 3*wk<br>4 wks   | ↑ PWC <sub>FT</sub> following<br>HMB > PLA & CON                  | HMB & HIIT<br>improves<br>aerobic<br>performance     | Performance |
| <b>Knitter 2000</b>   | Nutraceutical | 5 M<br>8 F   | n=8: 3g/d<br>HMB<br>n=5: PLA<br>6 wks                            | Running >30<br>km/wk | Attenuated ↑ in CPK<br>& LDH post 20 km<br>run following HMB      | HMB<br>ameliorates<br>aspects of<br>muscle<br>damage | Performance |

### Creatine

|                       |               |            |                                                                    |                                                                                 |                                                                         |                                            |             |
|-----------------------|---------------|------------|--------------------------------------------------------------------|---------------------------------------------------------------------------------|-------------------------------------------------------------------------|--------------------------------------------|-------------|
| <b>Greenhaff 1993</b> | Nutraceutical | 9 M<br>3 F | n=6: 20g/d<br>CR + 1g/d<br>glucose/<br>n=6: 24g/d<br>glucose<br>5d | 5 x 30 max<br>voluntary<br>contractions, before<br>and after<br>supplementation | CR ↓ peak<br>torque decline                                             | CR sustains<br>performance                 | Performance |
| <b>Birch 1994</b>     | Nutraceutical | 14 M       | n=7: CR<br>20g/d<br>n=7: PLA<br>5d                                 | 3 x 30 sec max<br>cycling sprints                                               | CR ↑ PPO, MPO and<br>total work output<br>during 1 <sup>st</sup> sprint | CR increases<br>aspects of<br>power output | Performance |

|                      |               |             |                                                  |                                                                  |                                                                                |                                                                        |                    |
|----------------------|---------------|-------------|--------------------------------------------------|------------------------------------------------------------------|--------------------------------------------------------------------------------|------------------------------------------------------------------------|--------------------|
| <b>Earnest 1995</b>  | Nutraceutical | 8 M         | n=4: 5g/d CR<br>n=4: PLA<br>2-4 wks              | 3 x 30 sec max cycling<br>1-RM test<br>70% of 1-RM until fatigue | CR ↑ total anaerobic work during cycling sprints, ↑ BW, ↑ total lifting volume | CR enhances muscle function                                            | Mass & Performance |
| <b>Cooke 1995</b>    | Nutraceutical | 12 M        | n=6: 5g CR + 1g glucose<br>n=6: PLA<br>5d        | Max cycling sprint                                               | ↔ in power indices                                                             | CR does not affect power output                                        | Performance        |
| <b>Mujika 1996</b>   | Nutraceutical | 11 M<br>9 F | n=10: 20g/d CR<br>n=10: PLA<br>1 wk              | 20, 50 & 100 m max swim                                          | No difference in race time between groups                                      | CR has no ergogenic benefits on sprint performance                     | Performance        |
| <b>Snow 1998</b>     | Nutraceutical | 8 M         | n=4: 30g/d CR + 30g/d dextrose<br>n=4: PLA<br>5d | 20 sec max cycling                                               | CR did not affect power indices                                                | CR has no ergogenic benefits on sprint performance                     | Performance        |
| <b>Thompson 1996</b> | Nutraceutical | 10 F        | n=5: 2g/d CR<br>n=5: PLA<br>6 wks                | 6 wks swimming (part of a swim team)                             | ↔ in lean mass, resynthesis of PCr or performance time                         | CR has no effect on body composition, anaerobic or aerobic performance | Mass & Performance |
| <b>Cooke 2009</b>    | Nutraceutical | 14 M        | n=7: 0.1-0.3g/kg/d CR + CHO<br>n=7: CHO<br>19d   | 4 sets, 10 ECC reps @ 120% of CONC 1-RM for 3 leg exercises      | CR+CHO ↑ isokinetic & isometric strength during recovery vs. CHO               | CR improves functional recovery                                        | Performance        |

|                      |               |              |                                                                                    |                                                                                                            |                                                                                      |                                                                        |                                |
|----------------------|---------------|--------------|------------------------------------------------------------------------------------|------------------------------------------------------------------------------------------------------------|--------------------------------------------------------------------------------------|------------------------------------------------------------------------|--------------------------------|
| <b>Volek 1999</b>    | Nutraceutical | 19 M         | n=10: 25 g/d<br>1 wk, 5 g/d 11<br>wks CR<br>n=9: PLA                               | RET 12 wks                                                                                                 | > ↑ in strength, CSA,<br>following CR vs.<br>PLA                                     | CR potentiates<br>RET-induced<br>muscle<br>adaptations                 | Mass &<br>Performance          |
| <b>Brose 2003</b>    | Nutraceutical | 15 M<br>13 F | n=14: 5g/d<br>CR + 2g<br>dextrose<br>n=14: pla                                     | RET 3*wk, 14 wks                                                                                           | > ↑ in FFM and<br>strength following<br>CR vs. PLA                                   | CR potentiates<br>RET-induced<br>mass and<br>functional<br>adaptations | Mass &<br>Performance          |
| <b>Carnitine</b>     |               |              |                                                                                    |                                                                                                            |                                                                                      |                                                                        |                                |
| <b>Stephens 2006</b> | Nutraceutical | 7 M          | n=7: 5h CAR<br>infusion (15<br>mg/kg prime,<br>10 mg/kg h<br>constant)<br>n=7: PLA | -                                                                                                          | CAR ↑ muscle<br>glycogen, LCA-CoA<br>& ↓ PDH complex<br>activity, lactate vs.<br>PLA | CAR can<br>inhibit CHO<br>oxidation                                    | Fuel<br>Metabolism             |
| <b>Wall 2011</b>     | Nutraceutical | 14 M         | n=7: 2 g CAR<br>+ 80 g CHO<br>n=7: 80 g<br>CHO<br>2*d, 24 wks                      | 30 mins cycling @<br>50% VO <sub>2max</sub> , 30<br>mins at 80%<br>VO <sub>2max</sub> , 30 min all-<br>out | @ 50% VO <sub>2max</sub><br>carnitine ↓ glycogen<br>use                              | CAR spares<br>muscle<br>glycogen                                       | Metabolism<br>&<br>Performance |
| <b>Stephens 2013</b> | Nutraceutical | 12 M         | n=6: 1.36<br>CAR + 80g<br>CHO<br>n=6: 80g<br>CHO<br>2*d, 12 wks                    | 30 min cycling @<br>50% VO <sub>2max</sub>                                                                 | CAR ↑ LCA-CoA<br>↑ fat mass in CHO                                                   | CAR<br>prevented fat<br>mass gain                                      | Metabolism                     |

|                        |               |              |                                                                                   |                                                          |                                                                                                        |                                                                              |                                          |
|------------------------|---------------|--------------|-----------------------------------------------------------------------------------|----------------------------------------------------------|--------------------------------------------------------------------------------------------------------|------------------------------------------------------------------------------|------------------------------------------|
| <b>Abramowicz 2005</b> | Nutraceutical | 6 M<br>6 F   | n=12: 1*3g<br>CAR + TART<br>n=12: 3g/d<br>CAR +<br>TART, 14d<br>n=12: PLA,<br>14d | 60 min cycling @<br>60% VO <sub>2max</sub>               | CAR + TART for<br>14d ↑ CHO oxidation<br>in M vs. PLA<br>No effect on FO                               | CAR & TART<br>promote CHO<br>oxidation<br>during<br>exercise                 | Metabolism                               |
| <b>Broad 2005</b>      | Nutraceutical | 15 M         | n=15: 3g/d<br>CAR + TART<br>n=15: PLA<br>4 wks                                    | 90 min cycling @<br>65% VO <sub>2max</sub> , 20 km<br>TT | FO and CHO similar<br>between CAR &<br>TART vs. PLA<br>during exercise<br>TT duration ↓ in PLA<br>only | CAR & TART<br>enhance<br>energy<br>metabolism or<br>endurance<br>performance | Energy<br>Metabolism<br>&<br>Performance |
| <b>n-3 PUFAs</b>       |               |              |                                                                                   |                                                          |                                                                                                        |                                                                              |                                          |
| <b>Smith 2011</b>      | Nutraceutical | 5 M<br>4 F   | 4g/d n-3<br>PUFAs<br>8 wks                                                        | –                                                        | ↑ MPS<br>& ↑ mTOR signalling<br>during<br>hyperinsulinaemia-<br>hyperaminoacidaemia                    | n-3 PUFAs<br>augments<br>acute anabolic<br>responses                         | Metabolism                               |
| <b>Smith 2011</b>      | Nutraceutical | 15 M<br>29 F | n=29: 4 g/d n-<br>3 PUFAs<br>n=15: corn oil<br>6 months                           | –                                                        | n-3 PUFAs ↑ mass &<br>↑ strength vs. corn oil                                                          | n-3 PUFAs<br>promotes<br>muscle growth                                       | Mass                                     |
| <b>Huffman 2004</b>    | Nutraceutical | 7 M          | n-3 PUFAs 4<br>g/d<br>3 wks                                                       | 60 mins running @<br>60% VO <sub>2max</sub>              | ↑ fat EE                                                                                               | Chronic n-3<br>PUFAs<br>promote fat<br>oxidation<br>during<br>exercise       | Metabolism                               |

|                     |               |           |                                                                                                    |                                     |                                                                                            |                                                             |                                      |
|---------------------|---------------|-----------|----------------------------------------------------------------------------------------------------|-------------------------------------|--------------------------------------------------------------------------------------------|-------------------------------------------------------------|--------------------------------------|
| <b>Logan 2015</b>   | Nutraceutical | 24 F      | n=12: 2g/d EPA + 1g/d DHA<br>n=12: PLA 12 wks                                                      | Pre & post exercise testing         | n-3 PUFAs ↑ LBM, ↑ rate of FO & ↓ TUG                                                      | n-3 PUFAs promotes fat metabolism, muscle mass and function | Mass, Fat Metabolism and Performance |
| <b>Smith 2015</b>   | Nutraceutical | 10 M 29 F | N=29: 1.86g/d EPA + 1.5 g/d DHA<br>N=25: PLA 24 wks                                                | -                                   | n-3 PUFAs ↑ muscle volume & strength vs. PLA                                               | n-3 PUFAs preserve muscle mass and function                 | Mass & Performance                   |
| <b>Rodacki 2012</b> | Nutraceutical | 45 F      | n=15: 400 g/d EPA + 300g/d DHA 90d + RET<br>n=15: 400 g/d EPA + 300g/d DHA 150d + RET<br>N=15: RET | RET 3*wk, 12 wks                    | > ↑ in peak torque following n3-PUFAs vs. RET                                              | n3-PUFAs potentiate strength adaptations to RET             | Strength Performance                 |
| <b>McGlory 2016</b> | Nutraceutical | 19 M      | n=10: 5g/d n3-PUFAs<br>n=9: PLA 8 wks                                                              | Acute RE 3 sets, 10 reps @ 70% 1-RM | Rest and exercise MPS similar following n3-PUFAs vs. PLA<br>↑ p70S6K1 after RE in PLA only | n3-PUFAs does not potentiate RE-induced metabolic responses | Metabolism                           |
| <b>Delarue 1996</b> | Nutraceutical | 4 M 1 F   | n=5: 6g/d n-3 PUFAs<br>n=5: PLA 3 wks                                                              | -                                   | n-3 PUFAs ↑ FO & ↓ CHO oxidation                                                           | n-3 PUFAs manipulates energy metabolism                     | Energy Metabolism                    |

|                              |               |      |                                                                             |                                                      |                                                                               |                                                                       |                    |
|------------------------------|---------------|------|-----------------------------------------------------------------------------|------------------------------------------------------|-------------------------------------------------------------------------------|-----------------------------------------------------------------------|--------------------|
| <b>Delarue 2003</b>          | Nutraceutical | 6 M  | n=6: 6g/d n-3 PUFAs<br>n=6: PLA<br>20d                                      | Acute 90 min cycling @ 60% max O <sub>2</sub> output | n-3 PUFAs tended to ↑ FO and ↓ CHO oxidation > PLA                            | n-3 PUFAs might manipulate energy metabolism during exercise          | Energy metabolism  |
| <b>Nitrates/Blood flow</b>   |               |      |                                                                             |                                                      |                                                                               |                                                                       |                    |
| <b>Tang 2011</b>             | Nutraceutical | 8 M  | n=8: 10g EAA + 10g Arg<br>n=8: PLA                                          | Unilateral acute RE, 5 sets 8-10 reps                | ↑ in blood flow and MPS following RE similar in Arg vs. PLA                   | Arg has no additive effects on muscle blood flow or MPS               | Protein Metabolism |
| <b>Churchward-Venne 2014</b> | Nutraceutical | 21 M | n=7: 45g Whey<br>n=7: 10g citrulline + 15g whey<br>n=7: 10g NEAA + 15g whey | Acute RE: 6x8-10 reps @ 80% 10-RM knee extension     | No ↑ in MPS, blood flow or perfusion following citrulline+whey vs. NEAA+whey  | No additive effect of citrulline on metabolism                        | Protein Metabolism |
| <b>Phillips 2016</b>         | Nutraceutical | 20 M | n=10: 350 mg cocoa flavanol<br>n=10: CON                                    | -                                                    | ↑ LBF and MBV following cocoa flavanol ↔ MPS following cocoa flavanol vs. CON | Cocoa flavanols improve vascular but not MPS responses to nutrition   | Protein Metabolism |
| <b>Lansley 2011</b>          | Nutraceutical | 9 M  | n=9: 500 ml BRJ<br>n=9: 500 ml PLA                                          | 4 & 16.1 km cycling TT                               | ↑ TT performance                                                              | Nitrates improve TT performance                                       | Performance        |
| <b>Larsen 2007</b>           | Nutraceutical | 9 M  | n=9: 0.1mmol/kg/d NaNO <sub>3</sub><br>n=9: PLA<br>3d                       | Sub-max and max cycling                              | NaNO <sub>3</sub> ↓ V <sub>O2</sub> at sub-max vs. PLA                        | NaNO <sub>3</sub> reduced O <sub>2</sub> cost during sub-max exercise | Performance        |



|                                |               |      |                                             |                                                   |                                                                                                                 |                                                                                |                       |
|--------------------------------|---------------|------|---------------------------------------------|---------------------------------------------------|-----------------------------------------------------------------------------------------------------------------|--------------------------------------------------------------------------------|-----------------------|
| <b>Bailey 2009</b>             | Nutraceutical | 8 M  | n=8: 500ml/d<br>BRJ<br>n=8: PLA<br>6d       | Moderate & intense<br>exercise                    | BRJ ↓V <sub>O2</sub> during<br>moderate exercise vs.<br>PLA<br>BRJ ↑ TTE during<br>intense exercise             | BRJ can<br>reduce O <sub>2</sub><br>cost &<br>improve<br>exercise<br>tolerance | Performance           |
| <b>Muggeridge<br/>2014</b>     | Nutraceutical | 9 M  | n=9: 1*70ml<br>BRJ<br>n=9: PLA              | 15 min steady state,<br>5 min rest, 16.1 km<br>TT | BRJ ↓V <sub>O2</sub> during<br>moderate exercise vs.<br>PLA<br>TT performance was<br>faster following BRJ       | BRJ enhances<br>endurance<br>performance                                       | Performance           |
| <b>Wylie 2013</b>              | Nutraceutical | 14 M | n=14: 490ml<br>BRJ over 30h<br>n=14: PLA    | Yo-Yo IR1                                         | BRJ ↑ Yo-Yo IR1<br>performance vs. PLA                                                                          | BRJ improved<br>high intensity<br>running<br>performance                       | Performance           |
| <b>Arnold 2015</b>             | Nutraceutical | 10 M | n=10: 70 ml<br>BRJ<br>n=10: PLA             | Incremental<br>treadmill running<br>+ 10km TT     | BRJ did not change<br>TTE during<br>incremental exercise<br>or time to completion<br>in the TT vs. PLA          | BRJ does not<br>enhance<br>endurance<br>running                                | Performance           |
| <b>Cermak 2012</b>             | Nutraceutical | 20 M | n= 20: 1*140<br>ml BRJ<br>n=20: PLA         | 1h cycling TT                                     | TT performance &<br>power output similar<br>between BRJ vs.<br>PLA                                              | BRJ does not<br>improve<br>endurance<br>performance                            | Performance           |
| <b>Wilkerson 2012</b>          | Nutraceutical | 8 M  | n=8: 1*500ml<br>BRJ<br>n=8: PLA             | 50 mile cycling TT                                | No difference<br>between BRJ vs.<br>PLA for completion<br>time & power output<br>Trend for BRJ ↓V <sub>O2</sub> | BRJ did not<br>improve TT<br>performance                                       | Performance           |
| <b>β-alanine and Carnosine</b> |               |      |                                             |                                                   |                                                                                                                 |                                                                                |                       |
| <b>Kendrick 2008</b>           | Nutraceutical | 26 M | n=13: 6.4g/d<br>β-ala<br>n=13: PLA<br>4 wks | RET 4*wk, 10 wks                                  | Similar ↑ in<br>strength & body<br>mass                                                                         | No additive<br>effect of β-ala<br>on strength,<br>mass                         | Mass &<br>Performance |

|                    |               |      |                                                     |                        |                                                                      |                                                        |             |
|--------------------|---------------|------|-----------------------------------------------------|------------------------|----------------------------------------------------------------------|--------------------------------------------------------|-------------|
| <b>Hill 2007</b>   | Nutraceutical | 25 M | n=13: 4-6.4g/d $\beta$ -ala<br>n=12: PLA            | -                      | 4 & 10 wks of $\beta$ -ala $\uparrow$ TWD during cycling             | $\beta$ -ala improves exercise capacity                | Performance |
| <b>Derave 2007</b> | Nutraceutical | 15 M | n=8: 4.8g/d $\beta$ -ala<br>n=7: PLA<br>4-5wks      | Track & field<br>~5*wk | $\beta$ -ala $\uparrow$ knee torque during repetitive exercise bouts | $\beta$ -ala attenuates fatigue                        | Performance |
| <b>Stout 2007</b>  | Nutraceutical | 22 F | n=11: 3.2-6.4g/d $\beta$ -ala<br>n=11: PLA<br>4 wks | -                      | $\beta$ -ala $\uparrow$ PWC <sub>FT</sub> , VT & TTE                 | $\beta$ -ala delays the onset of neuromuscular fatigue | Performance |

### VitD

|                       |               |                    |                                                                                              |                                  |                                                                                                                                                                    |                                                         |                      |
|-----------------------|---------------|--------------------|----------------------------------------------------------------------------------------------|----------------------------------|--------------------------------------------------------------------------------------------------------------------------------------------------------------------|---------------------------------------------------------|----------------------|
| <b>Agergaard 2015</b> | Micronutrient | 17 M, Y<br>17 M, O | n=7 Y, 7 O:<br>1920 IU/d VitD + 800 mg/d calcium<br>n=10 Y, 10 O: 800 mg/d calcium<br>16 wks | RET 3*wk @ 65-85% 1-RM, 12 wks   | Fibre type IIa %age $> \uparrow$ & myostatin mRNA $> \downarrow$ in Y<br>VitD vs. Y pla<br>No difference in the $\uparrow$ of CSA and strength in VitD vs. calcium | But no additive effect on mass or strength              | Mass and Performance |
| <b>Carrilo 2013</b>   | Micronutrient | 11 M<br>12 F       | n=10: 4000 IU/d VitD<br>n=13: PLA                                                            | RET 3*wk @ 70-80% 1-RM, 3 months | $\leftrightarrow$ LBM following VitD or PLA<br>$\uparrow$ peak power following VitD                                                                                | VitD has no impact on mass but can improve muscle power | Mass & Performance   |
| <b>Bunout 2006</b>    | Micronutrient | 10 M<br>86 F       | n=24: 800 mg/d calcium + 400 IU/d VitD<br>n=24: 800 mg/d calcium<br>n=24: 800 mg/d calcium   | RET 2*wk, 9 months               | $>$ improvement in TUG in VitD + RET vs. RET                                                                                                                       | VitD enhances muscle function                           | Performance          |

|                      |               |               |                                                                                                 |                                  |                                                                                                       |                                                                      |                      |
|----------------------|---------------|---------------|-------------------------------------------------------------------------------------------------|----------------------------------|-------------------------------------------------------------------------------------------------------|----------------------------------------------------------------------|----------------------|
|                      |               |               | + 400 IU/d<br>VitD + RET<br>n=24: 800<br>mg/d calcium<br>& RET                                  |                                  |                                                                                                       |                                                                      |                      |
| <b>Ceglia 2013</b>   | Micronutrient | 21 F          | 4000 IU/d<br>VitD<br>4 months                                                                   | –                                | ↑ type I/II CSA                                                                                       | VitD increases<br>muscle fibre<br>size                               | Mass                 |
| <b>VitC and VitE</b> |               |               |                                                                                                 |                                  |                                                                                                       |                                                                      |                      |
| <b>Bobef 2010</b>    | Micronutrient | 23 M,<br>25 F | n=11: AS<br>(1000 mg/d<br>VitC & 600<br>mg/d VitE)<br>n=12: PLA<br>n=13: RET<br>n=12:<br>AS+RET | RET 3*wk @ 80%<br>1-RM, 6 months | > ↑ FFM in<br>AS+RET vs.<br>PLA, RET or<br>AS.                                                        | AS potentiates<br>RET-induced<br>gains in FFM                        | Mass                 |
| <b>Bjørnsen 2015</b> | Micronutrient | 34 M          | n=17: AS<br>(1000 mg/d<br>VitC + VitE<br>235 mg/d)<br>n=17: PLA                                 | RET 3*wk, 3<br>months            | > ↑ in total LBM<br>and muscle<br>thickness in PLA<br>vs. AS                                          | AS blunt ↑ in<br>total LBM                                           | Mass                 |
| <b>Paulsen 2014</b>  | Micronutrient | 21 M<br>11 F  | n=17: AS<br>(1000 mg/d<br>VitC + 235<br>mg/d VitE)<br>n=15: PLA                                 | RET 4*wk, 10 wks                 | > ↑ p38 MAPK,<br>p70S6K, ↑<br>ERK1/2 in PLA<br>vs. AS<br>Similar changes<br>in FSR, CSA &<br>total LM | AS altered<br>protein<br>signalling but<br>not muscle<br>hypertrophy | Mass &<br>Metabolism |
| <b>Labontè 2008</b>  | Micronutrient | 27 M 34<br>F  | 600 mg VitE<br>+ 1000 mg<br>VitC<br>6 months                                                    | RET 3*wk, 6<br>months            | > ↑ FFM<br>compared to<br>RET alone                                                                   | AS potentiate<br>FFM gains                                           | Mass                 |

|                           |               |              |                                                                                                 |                                                  |                                                                                                                             |                                                             |                       |
|---------------------------|---------------|--------------|-------------------------------------------------------------------------------------------------|--------------------------------------------------|-----------------------------------------------------------------------------------------------------------------------------|-------------------------------------------------------------|-----------------------|
| <b>Bobef 2011</b>         | Micronutrient | 27 M<br>30 F | n=11: AS<br>(1000 mg/d<br>VitC + 600<br>mg/d VitE)<br>n=12: PLA<br>n=13: RET<br>n=12:<br>AS+RET | RET 3*wk @ 80%<br>1-RM, 6 months                 | Similar ↑ in FFM<br>and strength in<br>AS+RET vs.<br>RET                                                                    | AS do not<br>maximize<br>strength or<br>mass gains          | Mass &<br>Performance |
| <b>Paulsen 2014</b>       | Micronutrient | 26 M<br>28 F | n=27: AS<br>(1000 mg/d<br>VitC + 600<br>mg/d VitE)<br>n=27: PLA                                 | EET 3-4*wk, 11<br>wks                            | Similar ↑ in<br>VO <sub>2max</sub><br>↔ COX4 and<br>PGC-1α                                                                  | AS hampered<br>mitochondrial<br>cellular<br>adaptations     | Performance           |
| <b>Yfanti 2010</b>        | Micronutrient | 21 M         | n=11: AS<br>(500 mg/d<br>VitC + VitE<br>400 IU/d)<br>n=10: PLA<br>16 wks                        | EET 5*wk, 12 wks                                 | Similar ↑ in<br>VO <sub>2max</sub> , P <sub>max</sub> ,<br>workload at LT,<br>muscle glycogen,<br>muscle enzyme<br>activity | AS have no<br>effect on<br>adaptation to<br>EET             | Performance           |
| <b>Gomez-Cabrera 2008</b> | Micronutrient | 14 M         | n=5: VitC<br>1g/d + EET<br>n=9: EET                                                             | EET 3*wk 65-80%<br>of VO <sub>2max</sub> , 8 wks | Similar ↑ in<br>VO <sub>2max</sub>                                                                                          | VitC has no<br>effect on<br>adaptation to<br>EET            | Performance           |
| <b>Ursolic Acid</b>       |               |              |                                                                                                 |                                                  |                                                                                                                             |                                                             |                       |
| <b>Bang 2014</b>          | Nutraceutical | 16 M         | n=9: 450<br>mg/d UA<br>n=7: PLA                                                                 | RET 6*wk @60-<br>80% 1-RM, 8<br>weeks            | > ↑ strength vs.<br>PLA<br>↔ LBM in<br>UA or PLA                                                                            | UA promotes<br>gains in<br>strength but<br>not LBM          | Performance           |
| <b>Phosphatidic Acid</b>  |               |              |                                                                                                 |                                                  |                                                                                                                             |                                                             |                       |
| <b>Joy 2014</b>           | Nutraceutical | 28 M         | n=14: 750<br>mg/d PA<br>n=14: PLA                                                               | RET 3*wk, 8 wks                                  | > ↑ LBM,<br>CSA &<br>strength vs.<br>PLA                                                                                    | PA potentiates<br>RET-induced<br>mass and<br>strength gains | Mass &<br>Performance |

|                     |               |      |                               |                               |                         |                                                                         |                       |
|---------------------|---------------|------|-------------------------------|-------------------------------|-------------------------|-------------------------------------------------------------------------|-----------------------|
| <b>Hoffman 2012</b> | Nutraceutical | 16 M | n=7: 750 mg<br>PA<br>n=9: PLA | RET 4*wk @ 70%<br>1-RM, 8 wks | NS. ↑ LBM<br>& strength | PA did not<br>potentiate<br>RET-induced<br>gains in mass<br>or strength | Mass &<br>Performance |
|---------------------|---------------|------|-------------------------------|-------------------------------|-------------------------|-------------------------------------------------------------------------|-----------------------|
